# Supplementary material for: Highly soluble copper(i) iodide-based hybrid luminescent semiconductors containing molecular and one-dimensional coordinated anionic inorganic motifs
Source: Royal Society of Chemistry journal article supplement (doi:10.1039/d2tc05479e), 2023-01-01
Supplement: d2tc05479e1.pdf [file d2tc05479e1.pdf]

## Supporting Information

### **Highly Soluble Copper(I) Iodide Based Hybrid Luminescent Semiconductors Containing Molecular and One-dimensional Coordinated Anionic Inorganic Motifs**

Xiuze Hei,<sup>a</sup> Simon J. Teat,<sup>b</sup> Mingxing Li,<sup>c</sup> Megan Bonite<sup>a</sup> and Jing Li<sup>\*a</sup>

<sup>a</sup> *Department of Chemistry and Chemical Biology, Rutgers University, 610 Taylor Road, Piscataway, NJ, 08854, USA*

<sup>b</sup> *Advanced Light Source, Lawrence Berkeley National Laboratory, Berkeley, CA 94720, USA*

<sup>c</sup> *Center for Functional Nanomaterials, Brookhaven National Laboratory, Upton, NY 11973, USA*

## **TABLE OF CONTENT**

S1. Molecular structures and  $^1\text{H}$  NMR spectra of the ligands.

S2. Structural plots and PXRD patterns of compounds **1-5**.

S3. Photophysical properties of compounds **1-5**.

S4. DFT calculations.

## S1. Molecular structures and $^1\text{H}$ NMR spectra of the ligands.

All the  $^1\text{H}$  NMR spectra were collected using dimethyl sulfoxide- $d_6$  as solvent. The peaks at 2.50 ppm and  $\sim 3.3$  ppm are the residue DMSO and water peaks, respectively.

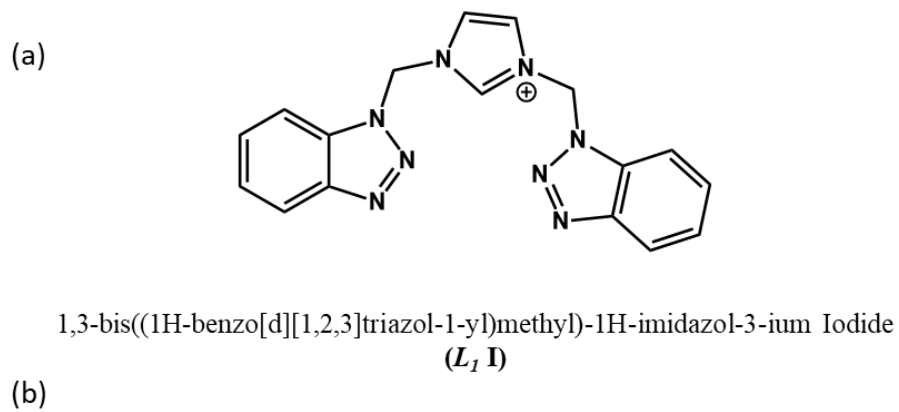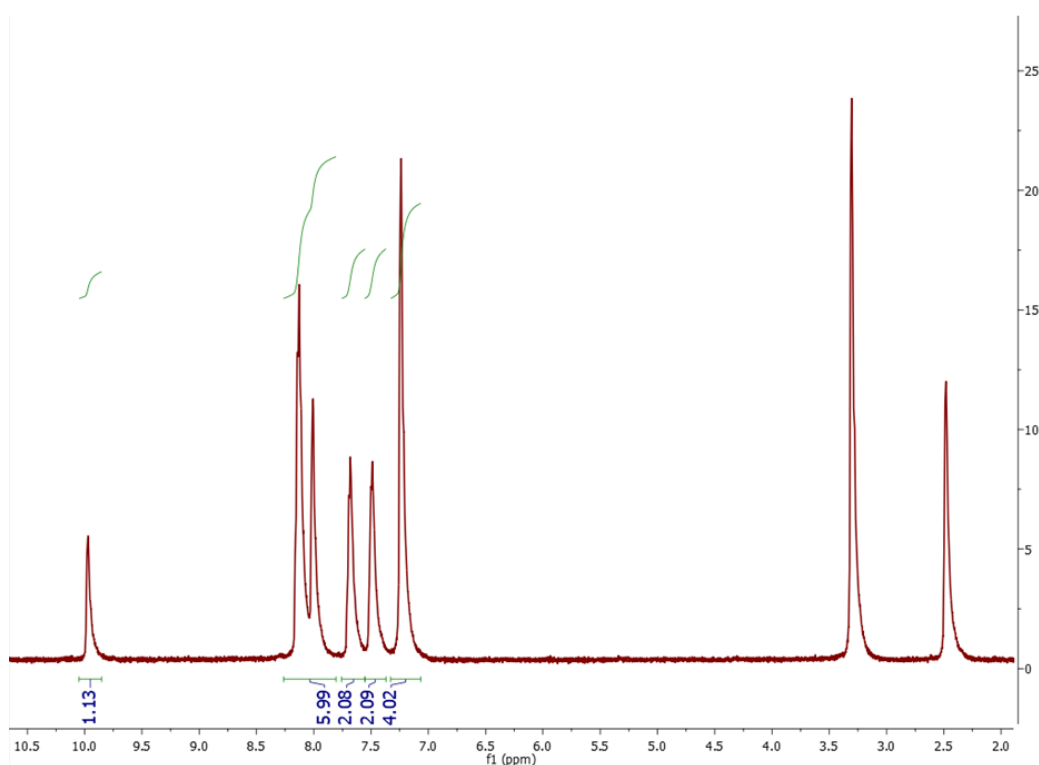

(a)

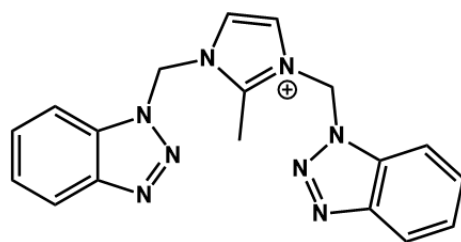

1,3-bis((1H-benzo[d][1,2,3]triazol-1-yl)methyl)-2-methyl-1H-imidazol-3-ium Iodide  
(*L*<sub>2</sub> I)

(b)

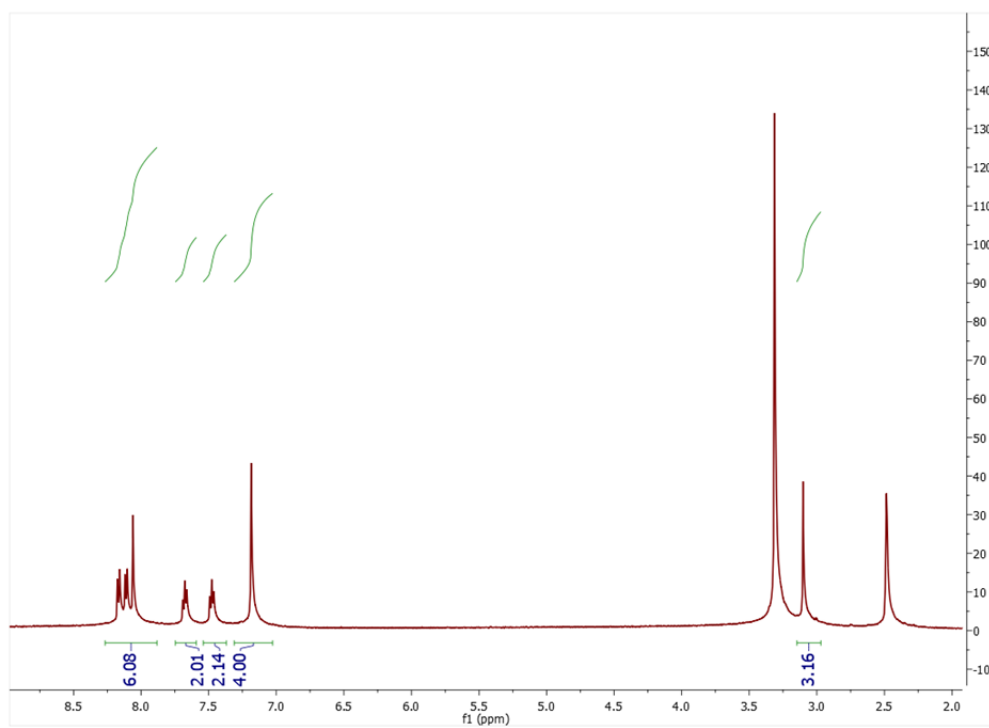

**Figure S2.** Structural plot and <sup>1</sup>H NMR spectrum of *L*<sub>2</sub> I.

(a)

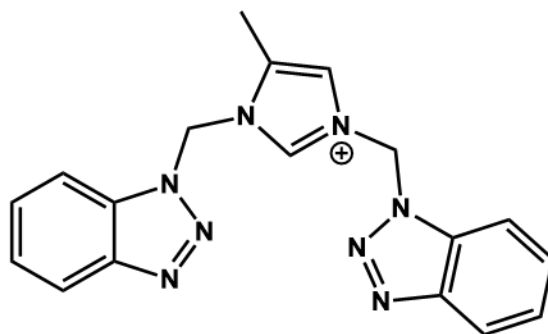

1,3-bis((1H-benzo[d][1,2,3]triazol-1-yl)methyl)-4-ethyl-1H-imidazol-3-ium Iodide  
( $L_3$  I)

(b)

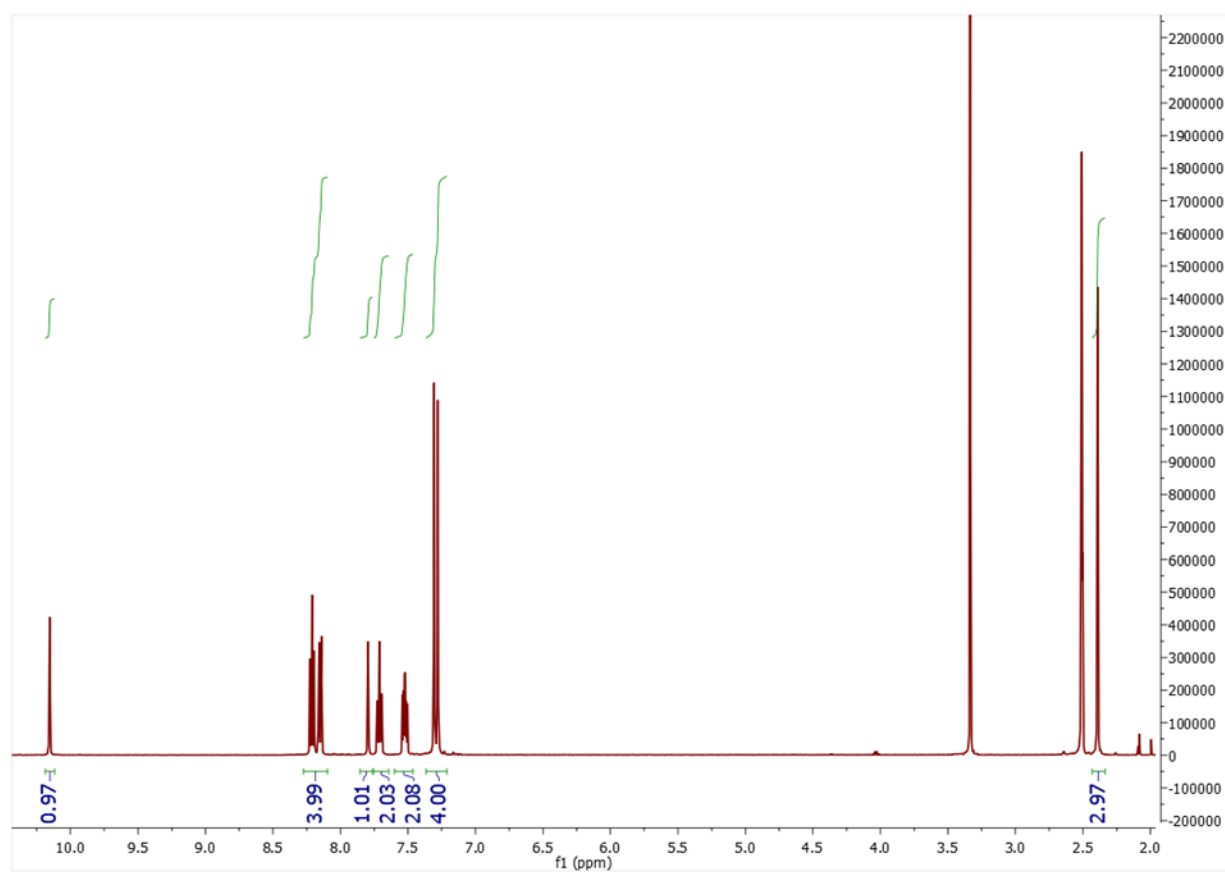

**Figure S3.** Structural plot and  $^1\text{H}$  NMR spectrum of  $L_3$  I.

(a)

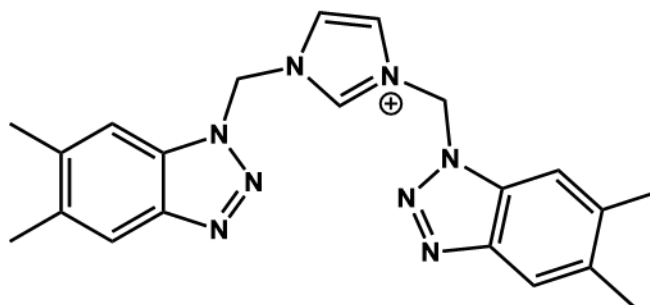

1,3-bis((5,6-dimethyl-1H-benzo[d][1,2,3]triazol-1-yl)methyl)-1H-imidazol-3-ium Iodide  
( $L_4$  I)

(b)

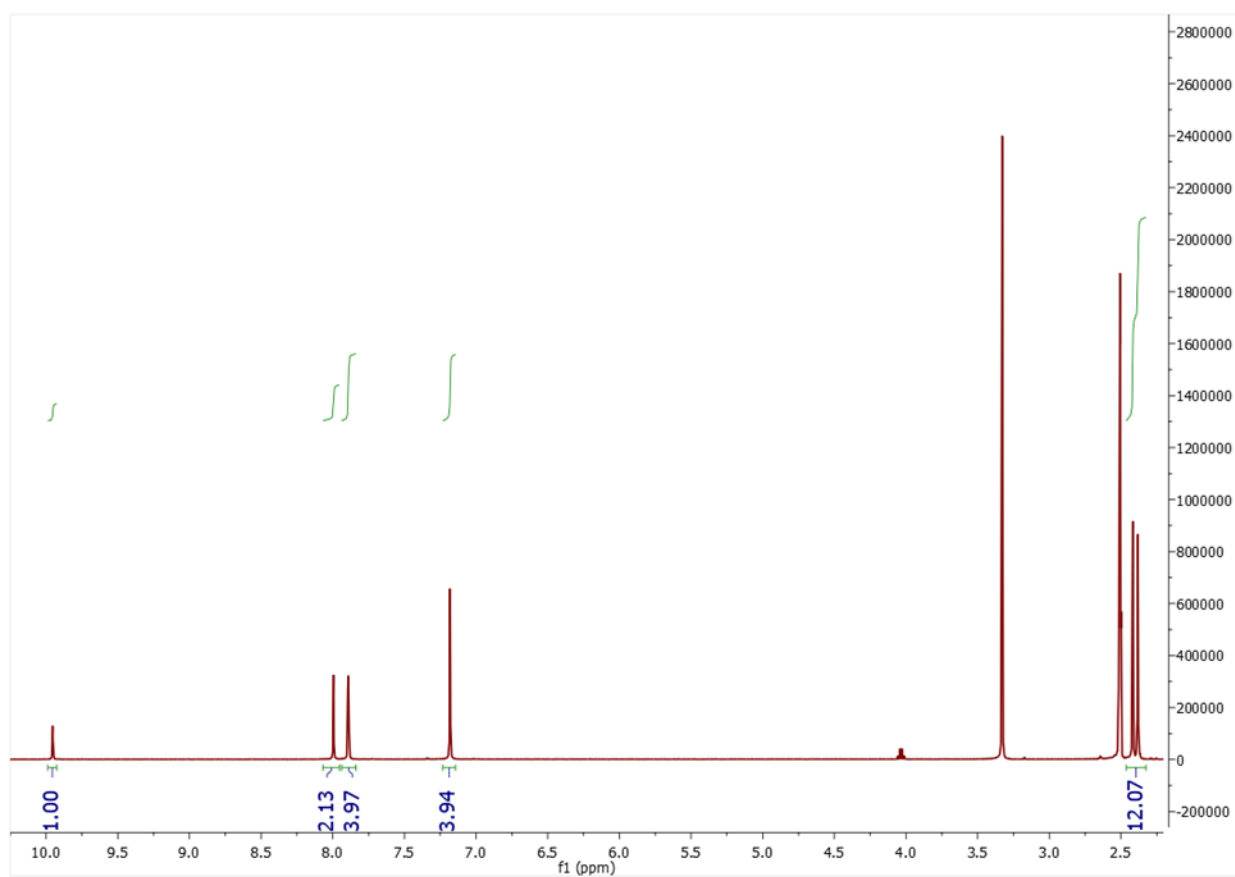

**Figure S4.** Structural plot and  $^1\text{H}$  NMR spectrum of  $L_4$  I.

## S2. Structural plots and PXRD patterns of compounds 1-5.

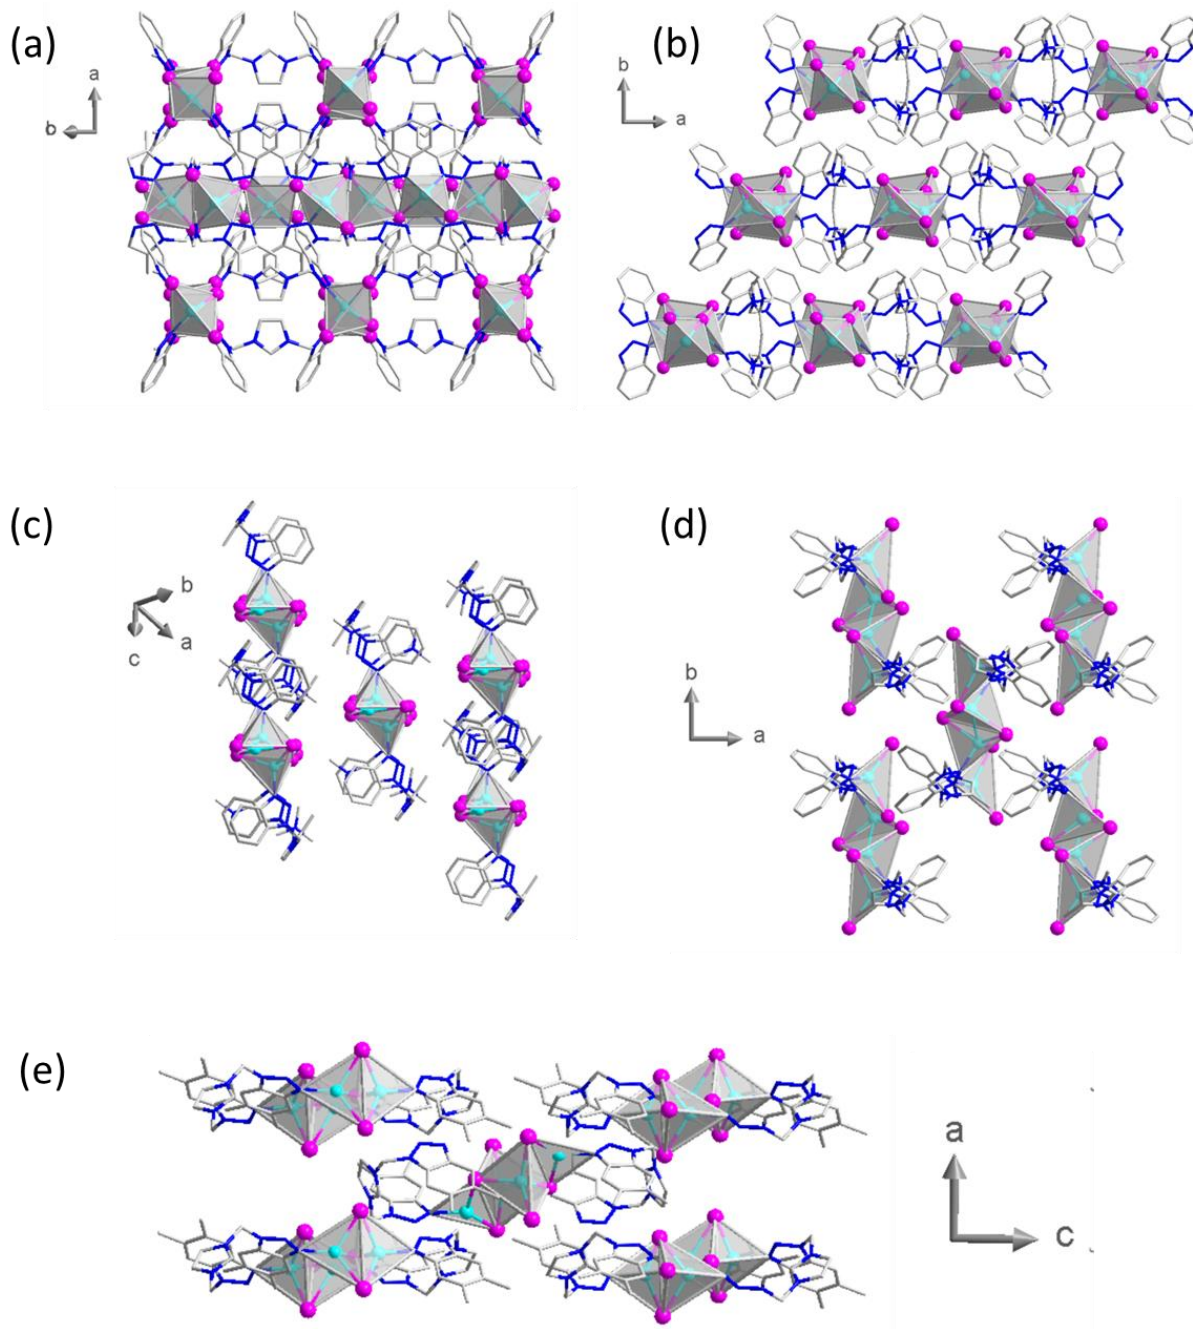

**Figure S5.** Structure plots of compounds (a) **1**, (b) **2**, (c) **3**, (d) **4** and (e) **5**. All H atoms are omitted for clarity.

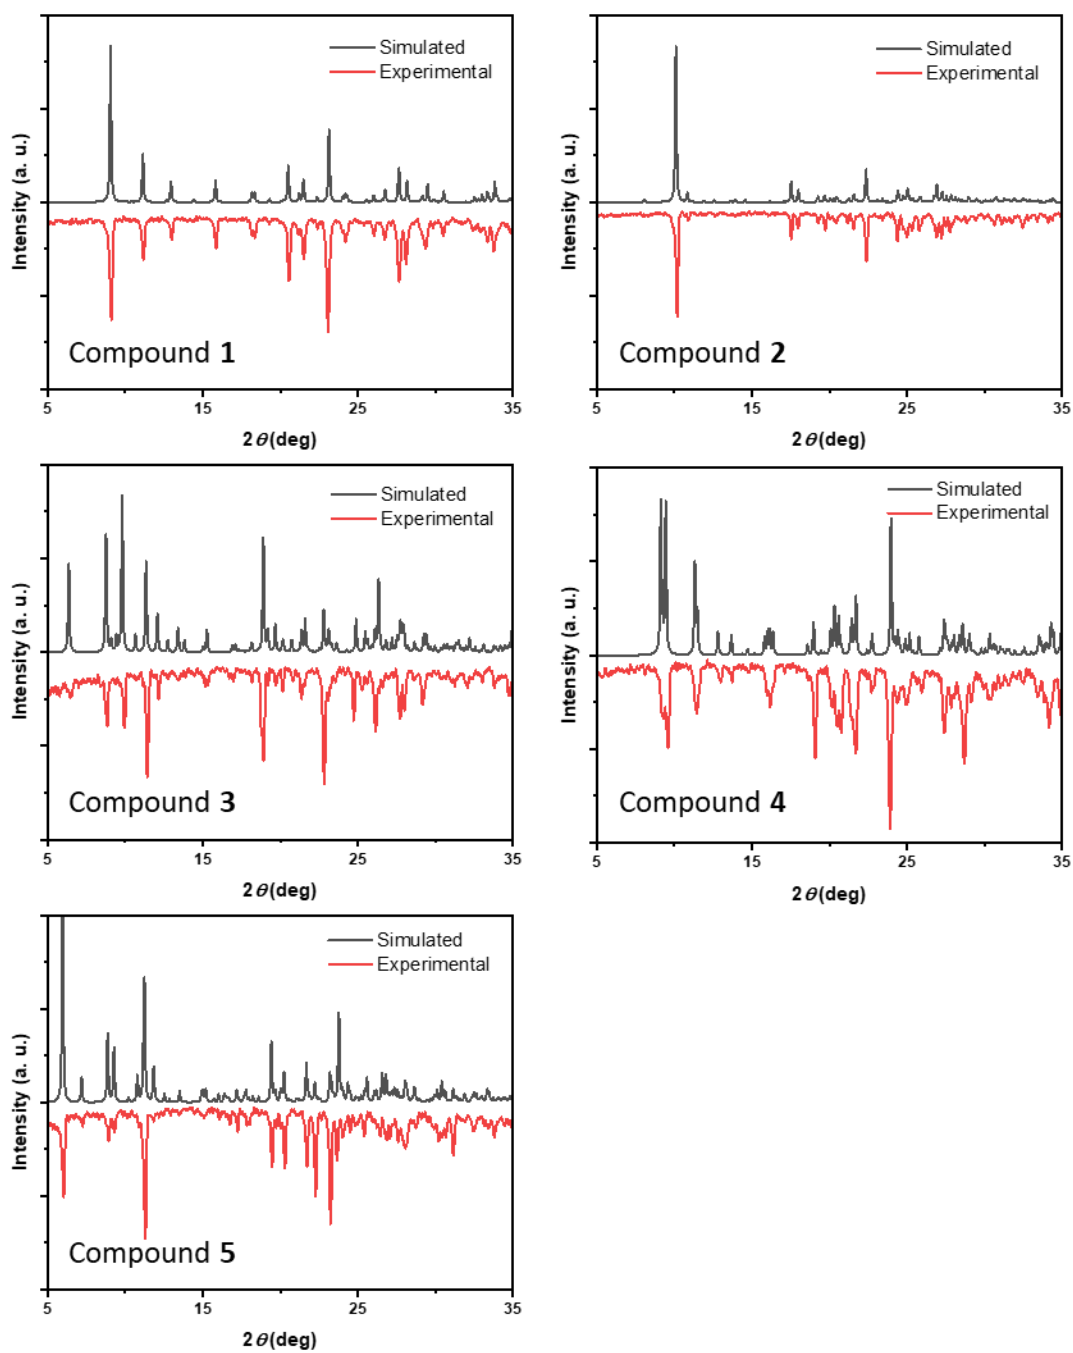

**Figure S6.** Experimental and simulated PXRD patterns for all five compounds.



### S3. Photophysical properties of compounds 1-5.

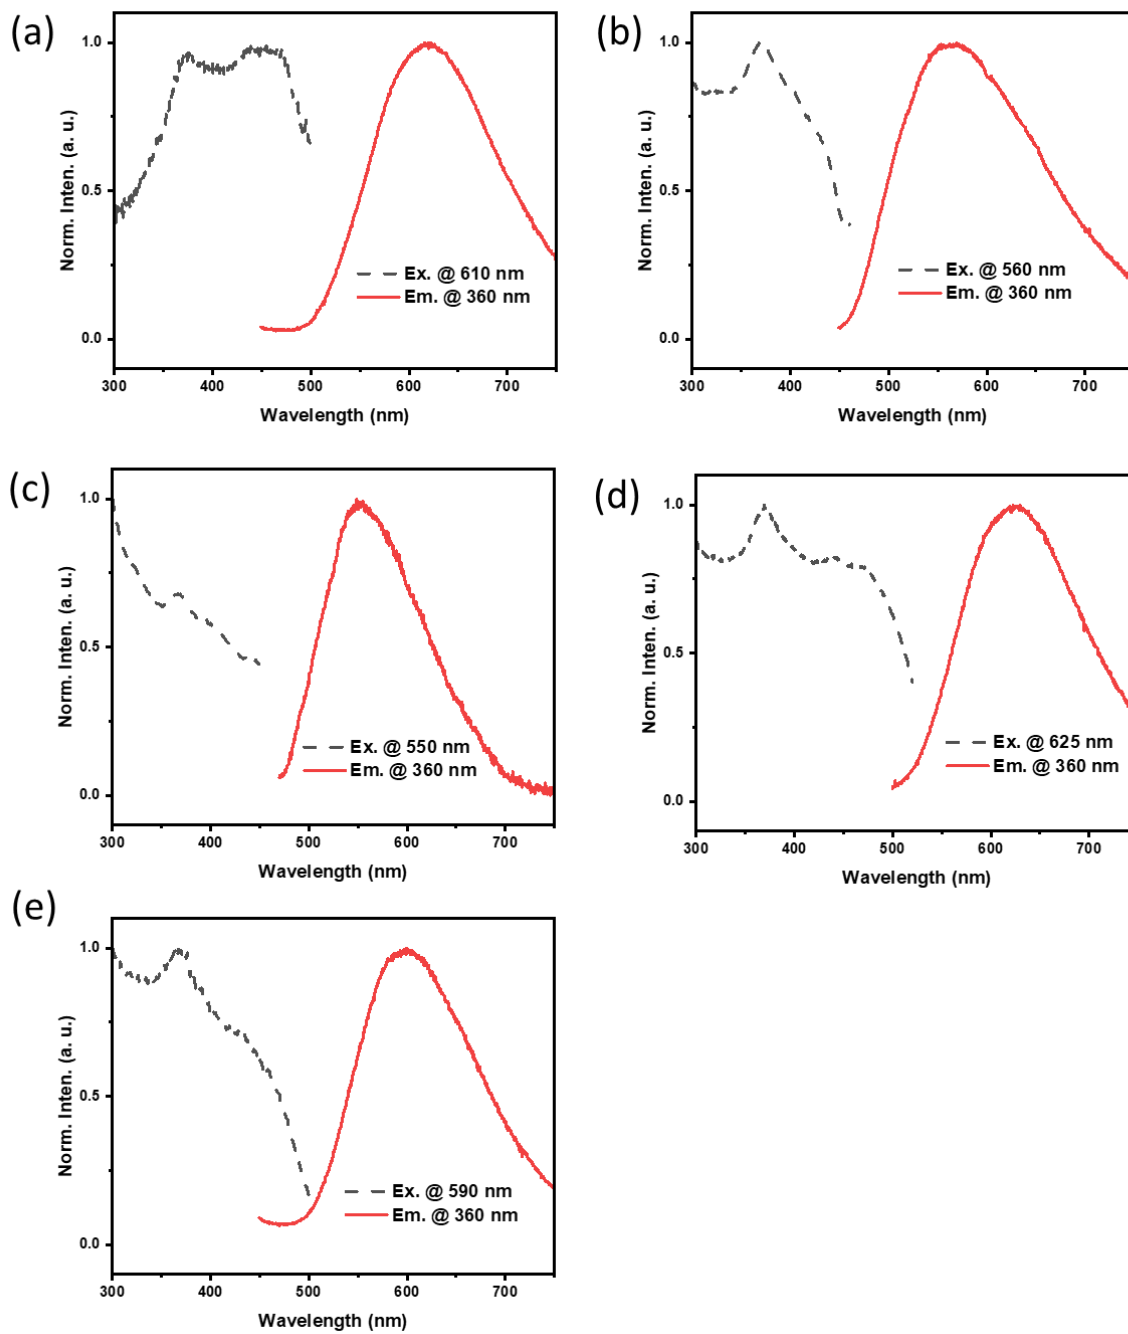

Figure S7. PL and PLE spectra of compounds (a) 1, (b) 2, (c) 3, (d) 4 and (e) 5.

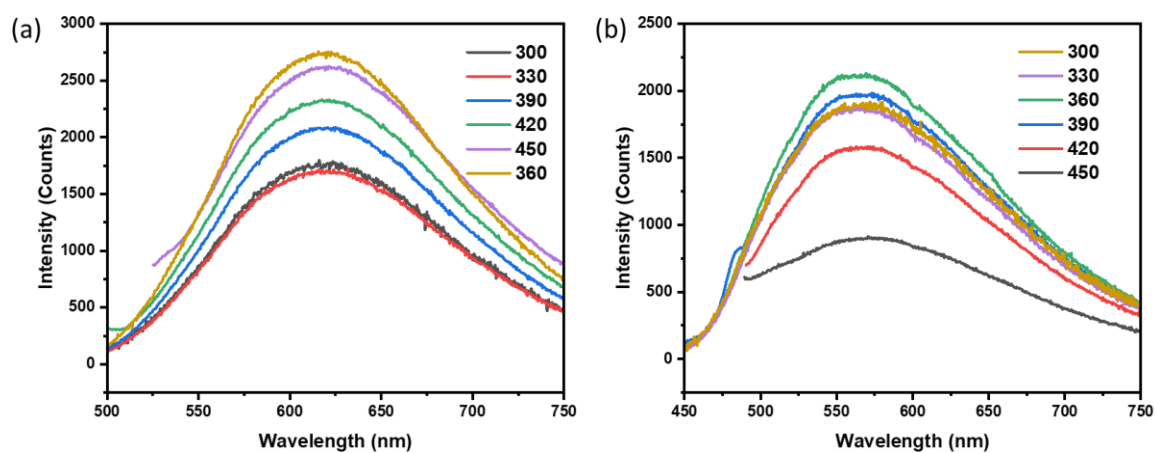

**Figure S8.** Excitation-dependent PL spectra of (a) compound **1** and (b) compound **2**.

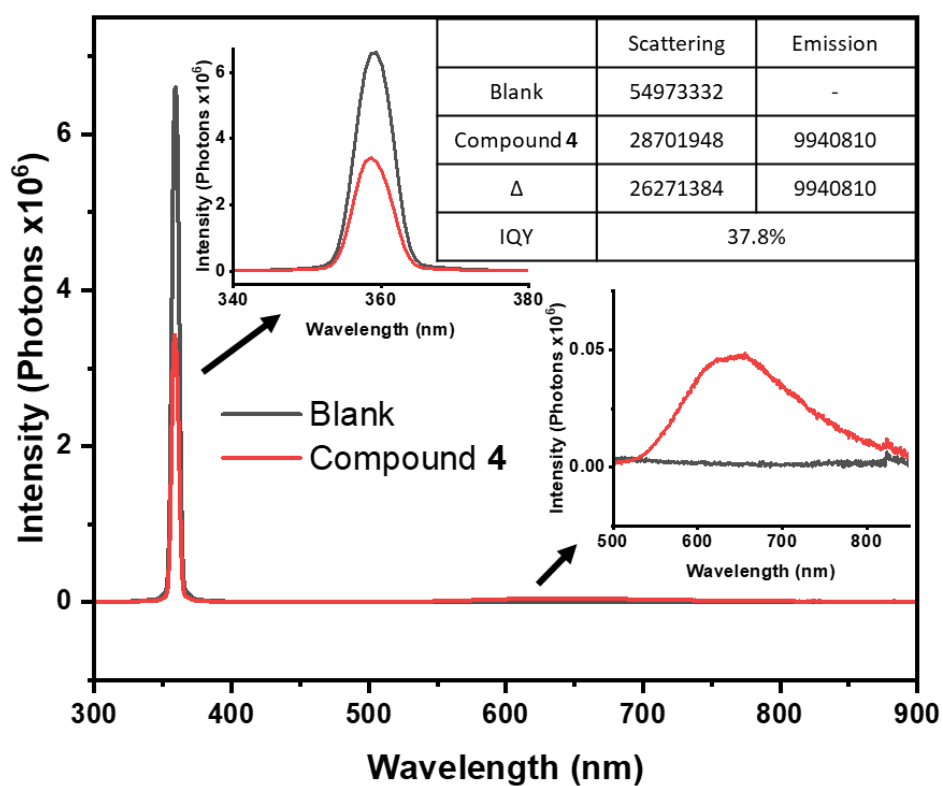

**Figure S9.** IQY measurement details of compound **4** recorded in the integrating sphere at  $\lambda_{\text{ex}} = 360$  nm.

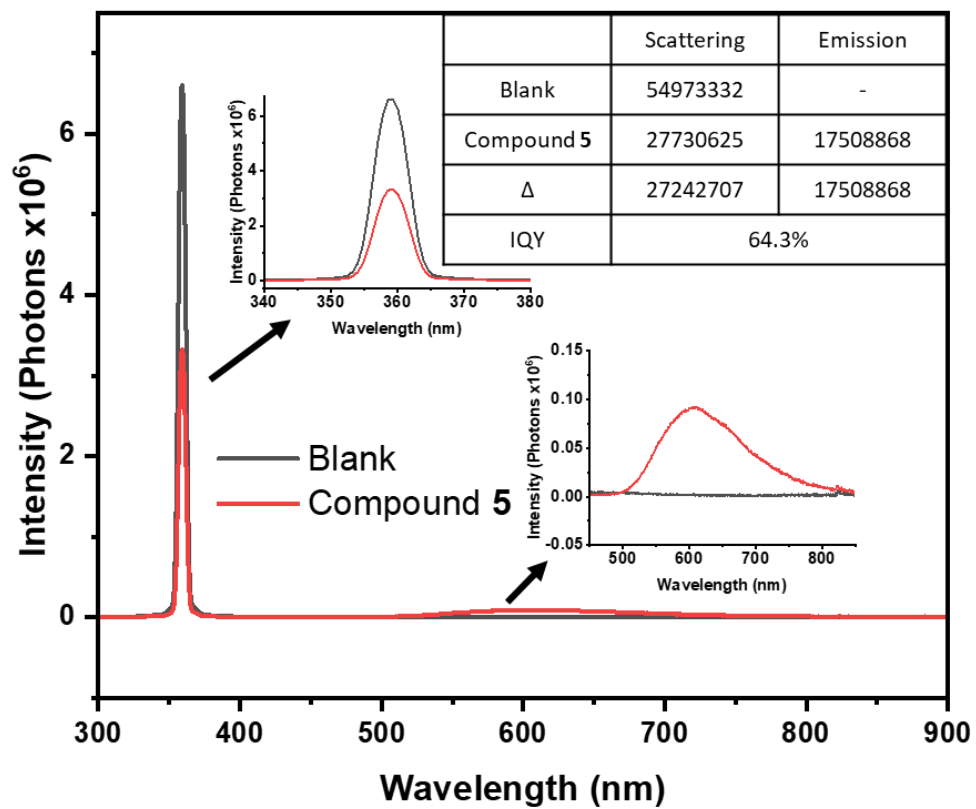

**Figure S10.** IQY measurement details of compound **5** recorded in the integrating sphere at  $\lambda_{\text{ex}} = 360$  nm.

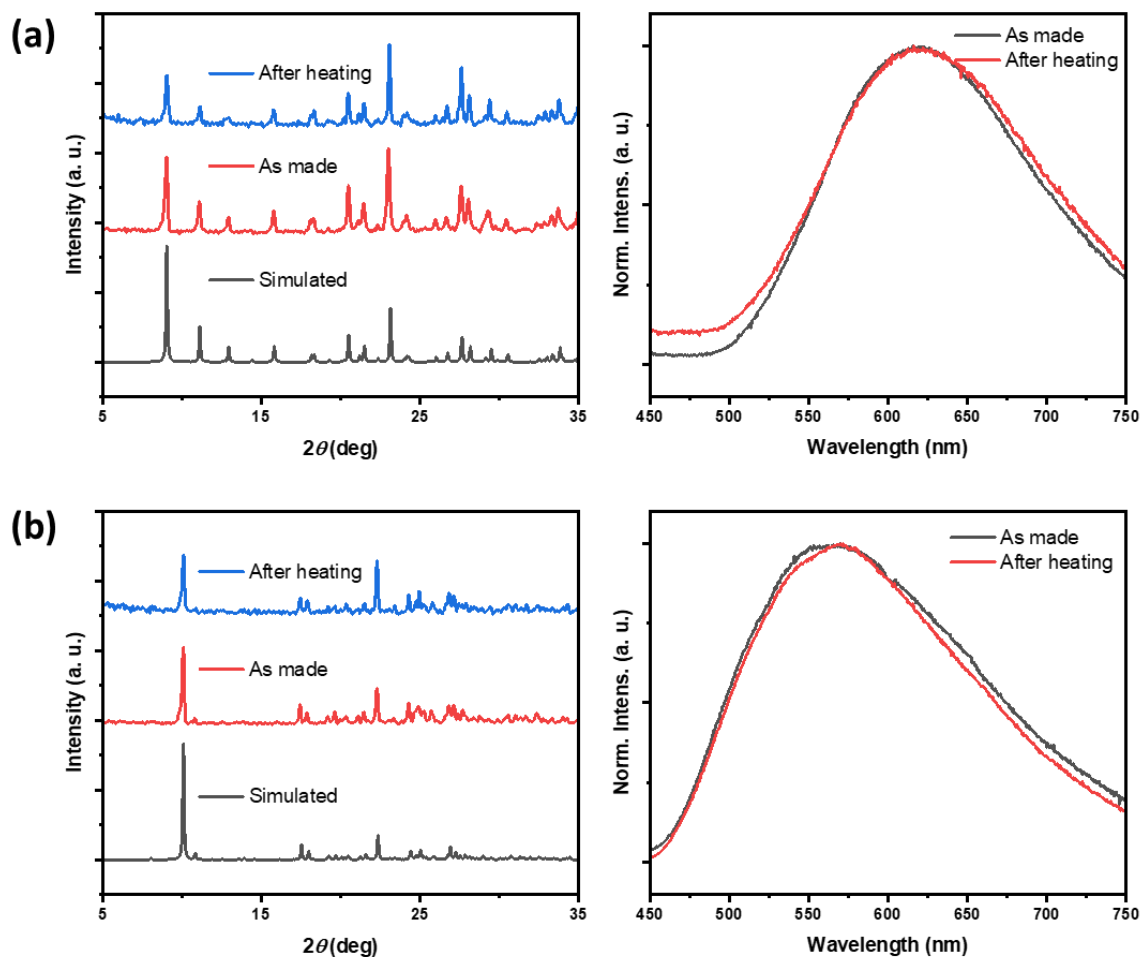

**Figure S11.** PXRD patterns (left) and PL spectra of (a) compound **1** and (b) compound **2** after heating to 200 °C.

**Table S1.** Lifetime values of compound **1** at various temperatures.

| Temp (K) | A1                | $\tau_1$ ( $\mu$ s) | A2                | $\tau_2$ ( $\mu$ s) | $\tau_{av/int}$ ( $\mu$ s) | $\tau_{av/amp}$ ( $\mu$ s) |
|----------|-------------------|---------------------|-------------------|---------------------|----------------------------|----------------------------|
| 78       | 235.9<br>(27.34%) | 3.865               | 626.9<br>(72.66%) | 14.549              | 13.578                     | 11.628                     |
| 150      | 538.1<br>(49.72%) | 3.747               | 544.1<br>(50.28%) | 11.701              | 9.788                      | 7.746                      |

|     |                    |        |                   |        |        |        |
|-----|--------------------|--------|-------------------|--------|--------|--------|
| 200 | 1220.0<br>(66.97%) | 2.0820 | 601.6<br>(33.03%) | 7.044  | 5.1844 | 3.7207 |
| 250 | 1618.7<br>(76.83%) | 1.0336 | 488.3<br>(23.17%) | 3.839  | 2.5157 | 1.6836 |
| 300 | 2102<br>(82.66%)   | 0.4867 | 440.8<br>(17.34%) | 1.7449 | 1.0267 | 0.7048 |

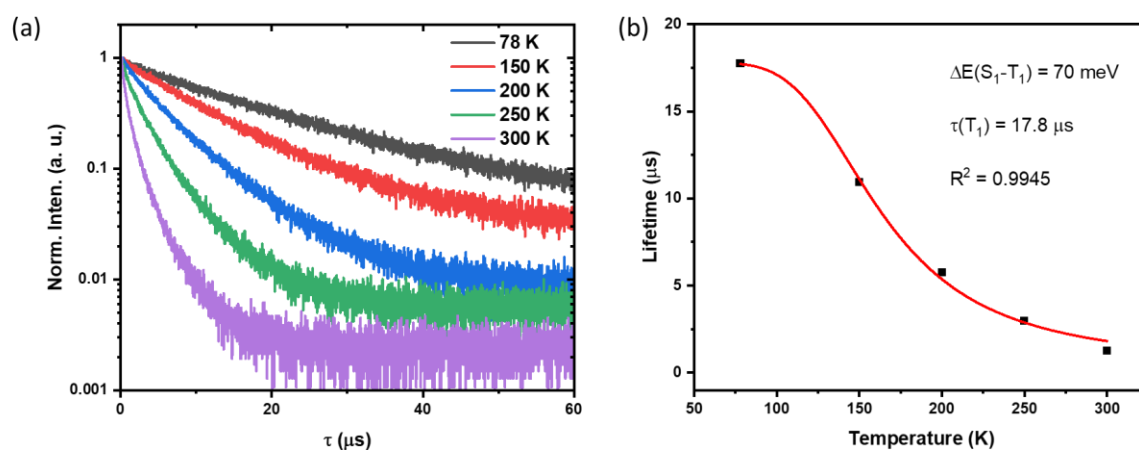

**Figure S12.** (a) Temperature dependent luminescence decay curves of compound **2**. (b) The observed decay times of compound **2** and the fitting curve according to eq. 1.

**Table S2.** Lifetime values of compound **2** at various temperatures.

| Temp (K) | A1                 | $\tau_1$ ( $\mu\text{s}$ ) | A2                 | $\tau_2$ ( $\mu\text{s}$ ) | $\tau_{\text{av/int}}$ ( $\mu\text{s}$ ) | $\tau_{\text{av/amp}}$ ( $\mu\text{s}$ ) |
|----------|--------------------|----------------------------|--------------------|----------------------------|------------------------------------------|------------------------------------------|
| 78       | 113.7<br>(11.46%)  | 5.16                       | 878.5<br>(88.54%)  | 19.392                     | 18.919                                   | 17.761                                   |
| 150      | 795.4<br>(58.83%)  | 8.140                      | 556.7<br>(41.17%)  | 14.883                     | 11.925                                   | 10.916                                   |
| 200      | 1450.8<br>(53.29%) | 3.442                      | 1271.7<br>(46.71%) | 8.364                      | 6.791                                    | 5.741                                    |

|     |                    |        |                    |        |        |        |
|-----|--------------------|--------|--------------------|--------|--------|--------|
| 250 | 2043.5<br>(62.74%) | 1.7606 | 1213.8<br>(37.26%) | 5.0373 | 3.8235 | 2.9817 |
| 300 | 3036<br>(75.76%)   | 0.7389 | 971.7<br>(24.24%)  | 2.8966 | 1.9396 | 1.2620 |

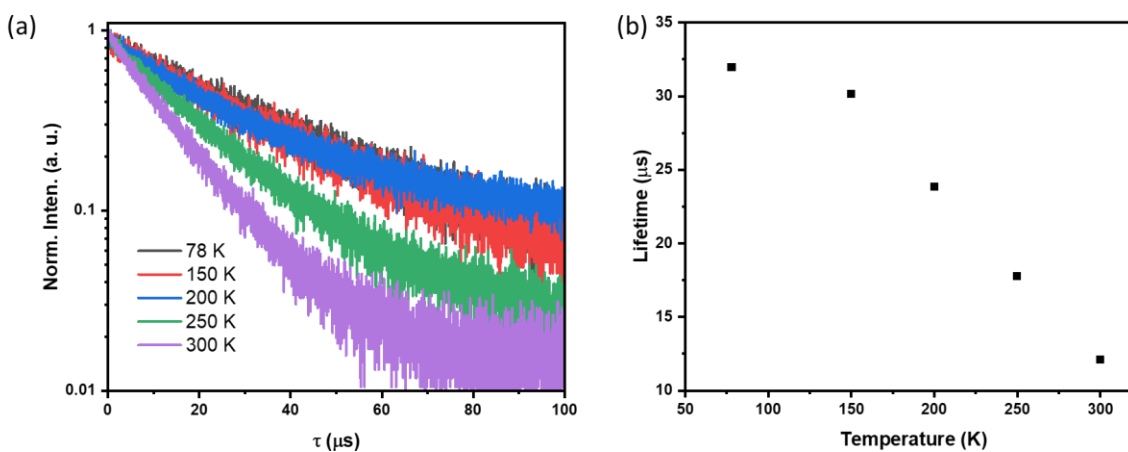

**Figure S13.** (a) Temperature dependent luminescence decay curves of compound **4**. (b) The observed decay times of compound **4**.

**Table S3.** Lifetime values of compound **4** at various temperatures.

| Temp (K) | A1               | $\tau_1$ ( $\mu\text{s}$ ) | A2                 | $\tau_2$ ( $\mu\text{s}$ ) | $\tau_{\text{av/int}}$ ( $\mu\text{s}$ ) | $\tau_{\text{av/amp}}$ ( $\mu\text{s}$ ) |
|----------|------------------|----------------------------|--------------------|----------------------------|------------------------------------------|------------------------------------------|
| 78       | 26.8<br>(10.47%) | 8.60                       | 229.43<br>(89.53%) | 34.700                     | 33.96                                    | 31.97                                    |
| 150      | 31.8<br>(13.07%) | 8.77                       | 211.83<br>(86.93%) | 33.374                     | 32.44                                    | 30.16                                    |
| 200      | 59.1<br>(12.47%) | 6.94                       | 414.99<br>(87.53%) | 26.238                     | 25.54                                    | 23.83                                    |
| 250      | 54.8<br>(8.97%)  | 3.54                       | 556.67<br>(91.03%) | 19.152                     | 18.87                                    | 17.75                                    |
| 300      | 68.2<br>(9.47%)  | 3.19                       | 652.4<br>(90.53%)  | 13.015                     | 12.77                                    | 12.09                                    |

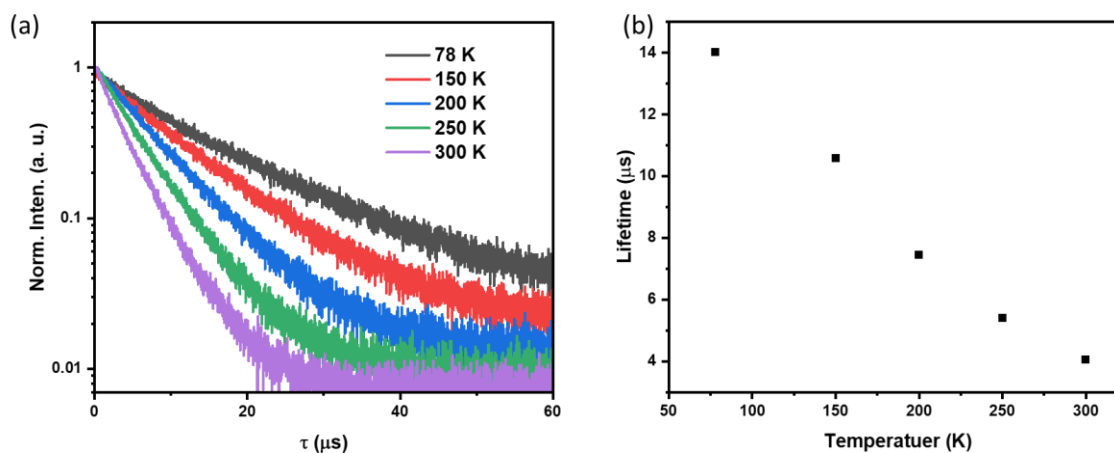

**Figure S14.** (a) Temperature dependent luminescence decay curves of compound **5**. (b) The observed decay times of compound **5**.

**Table S4.** Lifetime values of compound **5** at various temperatures.

| Temp (K) | A1     | $\tau_1$ ( $\mu\text{s}$ ) | $\tau_{\text{av/int}}$ ( $\mu\text{s}$ ) | $\tau_{\text{av/amp}}$ ( $\mu\text{s}$ ) |
|----------|--------|----------------------------|------------------------------------------|------------------------------------------|
| 78       | 865.5  | 14.029                     | 14.029                                   | 14.029                                   |
| 150      | 880.8  | 10.575                     | 10.575                                   | 10.575                                   |
| 200      | 1799.5 | 7.4369                     | 7.4369                                   | 7.4369                                   |
| 250      | 2390.4 | 5.3924                     | 5.3924                                   | 5.3924                                   |
| 300      | 2837.5 | 4.0598                     | 4.0598                                   | 4.0598                                   |

## S4. DFT calculations.

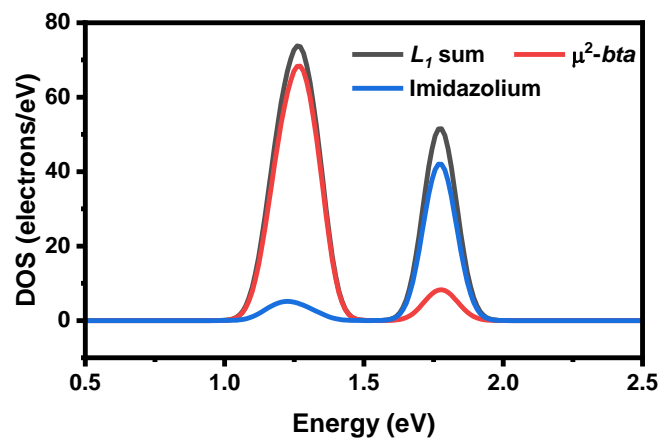

**Figure S15.** Zoom in of the conduction band region of compound **1**.

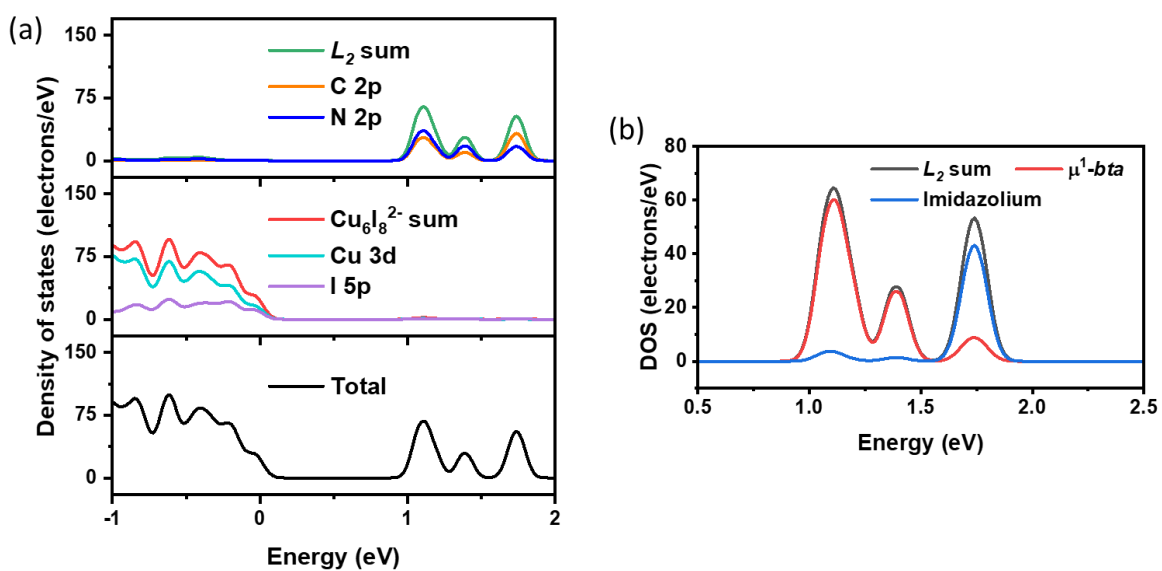

**Figure S16.** (a) Calculated TDOS and PDOS of compound **2**. (b) Zoom in of the conduction band region of compound **2**.



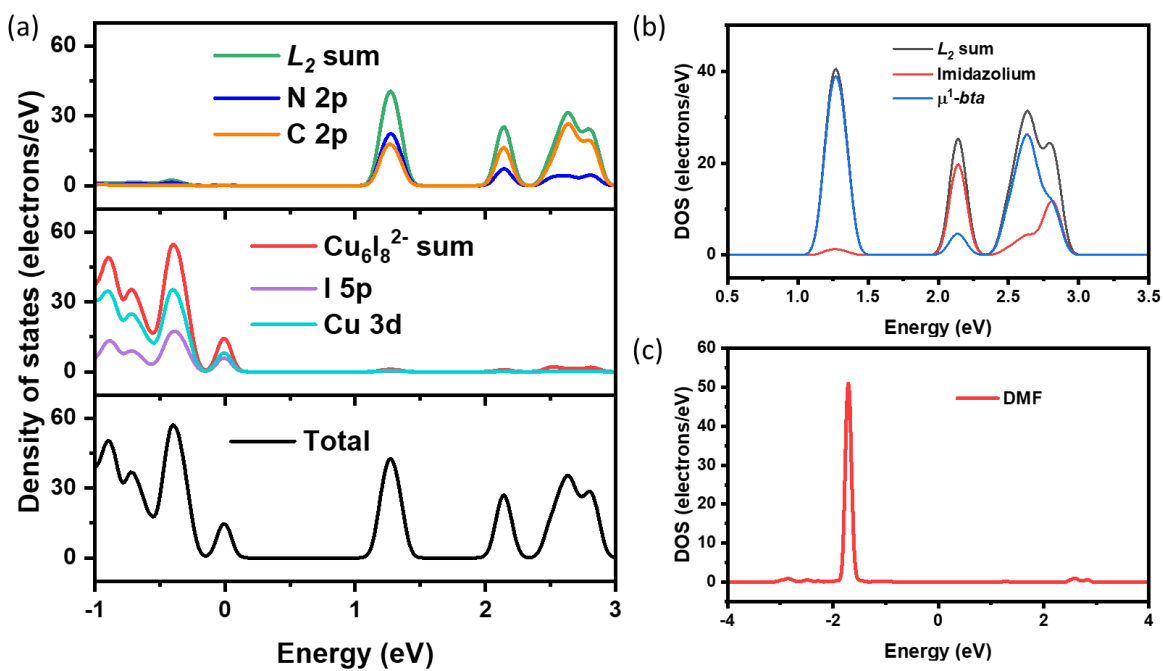

**Figure S17.** (a) Calculated TDOS and PDOS of compound 3. (b) Zoom in of the conduction band region of compound 3. (c) Contributions from solvated DMF molecules.

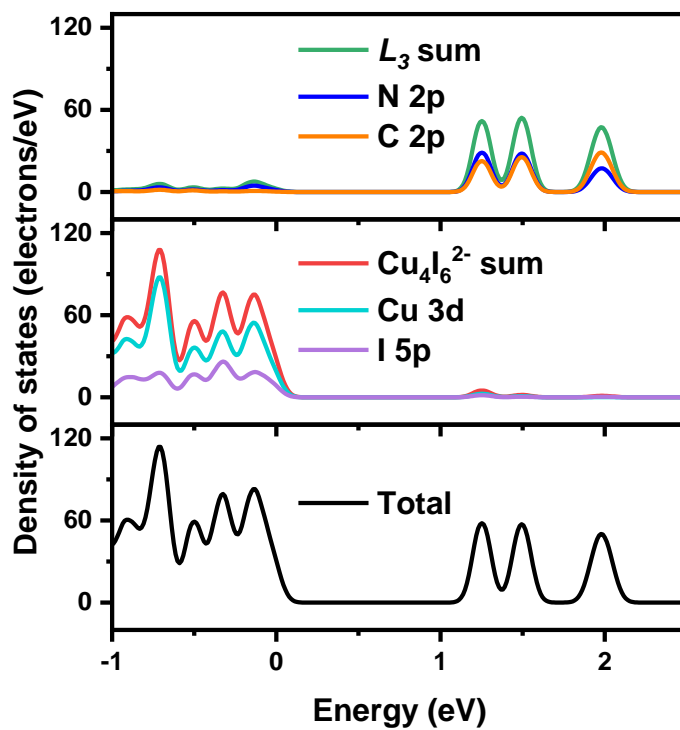

**Figure S18.** (a) Calculated TDOS and PDOS of compound 4.

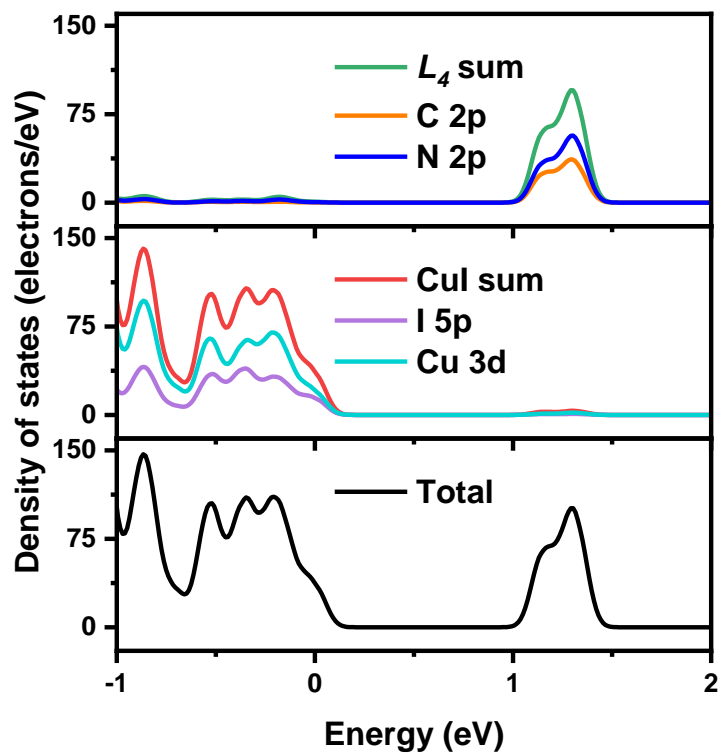

**Figure S19.** (a) Calculated TDOS and PDOS of compound 5.
